# Supplementary material for: Phylogenomics of the Andean Tetraploid Clade of the American Amaryllidaceae (Subfamily Amaryllidoideae): Unlocking a Polyploid Generic Radiation Abetted by Continental Geodynamics
Source: Front Plant Sci. 2020 Nov 5;11:582422. doi: 10.3389/fpls.2020.582422 (PMC7674842; doi:10.3389/fpls.2020.582422)
Supplement: Supplementary Table 1 — Samples used in the phylogenomic analyses of the Andean tetraploid clade of Amaryllidaceae subfam. Amaryllidoideae, and accession numbers for fastq files from the sequence capture. [file Table_1.XLSX]

## Sheet: Sheet1
Table S1. Samples used in the phylogenomic analyses of the Andean tetraploid clade of Amaryllidaceae subfam. Amaryllidoideae
Lab Sample No.	Taxon	Authority(ies)	Voucher (GenBank format)	Provenance	NCBI-SRA Accession no.
PG34	Caliphruria korsakoffii	(Traub) Meerow	FLAS:Meerow:1096	North Peru	SAMN15066108
M711	Caliphruria subedentata	Baker	FLAS:Meerow:1109	Colombia	SAMN15066109
M718	Caliphruria tenera	Baker	CUVC:Cano-Palacios:s.n.	Colombia	SAMN15066110
M795	Chlidanthus boliviensis	Traub & A. Nelson	MO:Doran:44	Bolivia	SAMN15066111
M790	Clinanthus coccineus	(Ruiz & Pav.) Meerow	HAO:S. Leiva & M. Leiva: 5703	North Peru	SAMN15066112
M099	Clinanthus humilis	(Herb.) Meerow	K:Herklotts:s.n.	South Peru, Chile	SAMN15066113
M738	Clinanthus imasumacc	(Vargas) Meerow	K:Munn:136	South Peru	SAMN15066114
M733	Clinanthus incarnatusEC	(Kunth) Meerow	NA:Meerow:3518	Ecuador	SAMN15066115
M737	Clinanthus incarnatusPE	(Kunth) Meerow	FTG:Meerow:1159	North Peru	SAMN15066116
M735	Clinanthus ruber	(Herb.) Meerow & A. Cano	NA:Meerow: 3517	North Peru	SAMN15066117
M742	Clinanthus sp.		NA:Meerow:3516	Central Peru	SAMN15066120
M741	Clinanthus variegatus1	(Ruiz & Pav.) Meerow	FTG:Meerow:1120	South Peru	SAMN15066118
PG29	Clinanthus variegatus2	(Ruiz & Pav.) Meerow	FTG:Meerow:3521	South Peru	SAMN15066119
M149	Eucharis amazonica	Lind. ex Planch.	FLAS:Schunke: 14057	North Peru	SAMN15066121
PG63	Eucharis astrophiala	(Ravenna) Ravenna	FLAS:Meerow :1140	Ecuador	SAMN15066122
PG55	Eucharis bonplandii	Kunth	CUVC:Silverstone-Sopkin:s.n.	Colombia	SAMN15066123
M728	Eucharis caucana	Meerow	CUVC:Silverstone-Sopkin:s.n.	Colombia	SAMN15066124
PG57	Eucharis formosa	Meerow	FLAS:Whitten et al:95020	Ecuador	SAMN15066125
PG08	Eucharis sanderi	Baker	CUVC:Silverstone-Sopkin:s.n.	Colombia	SAMN15066126
M793	Eucharis sp.		CUVC:Reina:s.n.	Colombia	SAMN15066127
M674	Eucrosia aurantiaca	(Baker) Traub	F:Plowman:4600	Ecuador	SAMN15066128
M018	Eucrosia bicolor	Ker Gawl.	F:Plowman:54512	Ecuador	SAMN15066129
PG32	Eucrosia dodsonii	Meerow & Dehgan	FLAS:Meerow:1115	Ecuador	SAMN15066130
PG59	Eucrosia mirabilis	(Baker) Pax	NA:Meerow:	Ecuador	SAMN15066131
M631	Eucrosia stricklandii	Meerow & Dehgan	SEL:Plowman 14356A	South Peru	SAMN15066132
M105	Eustephia darwinii	Vargas	FTG:Meerow:2436	South Peru	SAMN15066133
M719	Griffinia alba	Preuss & Meerow	UEC:Campos-Rocha et al:1478	Brazil	SAMN15066134
M691	Griffinia gardneriana	(Herb.) Ravenna	UEC:Campos-Rocha: 1017	Brazil	SAMN15066135
M137	Hieronymiella marginata	(R. E. Fries) Di Fulvio & Hunz.	K:Chase:1901	Argentina	SAMN15066136
PG30	Hippeastrum reticulatum	Herb.	FTG:Meerow:2407	Brazil	SAMN15066137
PG22	Hymenocallis acutifolia	(Herb.) Sweet	FTG:Meerow:2424	Mexico	SAMN15066138
M637	Hymenocallis aff. riparia		NA:Meerow:3603	Mexico	SAMN15066139
PG05	Hymenocallis arenicola	Northr.	NA:Meerow:3600	Bahamas	SAMN15066140
M632	Hymenocallis astrostephana	T. M. Howard	NA:Meerow:3505	Mexico	SAMN15066141
PG85	Hymenocallis azteciana	Traub	NA:Meerow:3606	Caribbean	SAMN15066142
PG94	Hymenocallis caribaea	(L.) Herb.	NA:Meerow:3605	West Indies	SAMN15066143
PG45	Hymenocallis caymenensis	Herb.	NA:Meerow:3502	Cayman Islands	SAMN15066144
PG09	Hymenocallis cf. fragrans		NA:Meerow:	Jamaica	SAMN15066145
M245	Hymenocallis chiapasiana	T. M. Howard	MO:Traub:1185	Mexico	SAMN15066146
M253	Hymenocallis choctawensis	Traub	MO:Traub:263	SE U.S.	SAMN15066147
PG89	Hymenocallis coronaria	(Leconte) Kunth	NA:Meerow:3608	SE U.S.	SAMN15066148
M246	Hymenocallis crassifolia	Herb.	NA:Meerow:3609	Mexico	SAMN15066149
PG95	Hymenocallis durangoensis	T. M. Howard	MO:Traub:1175	Mexico	SAMN15066150
PG84	Hymenocallis eucharidifolia	Baker	FTG:Meerow:2439	Mexico	SAMN15066151
M278	Hymenocallis eulae	Shinners	NA:Meerow:3610	SE U.S.	SAMN15066152
PG07	Hymenocallis fragrans	Salisb.	NA:Meerow:3507	Jamaica	SAMN15066153
PG96	Hymenocallis franklinensis	G.Lom.Sm., L.C.Anderson & Flory	FSU:Anderson:13382	SE U.S.	SAMN15066154
PG80	Hymenocallis gigantiflora	Meerow	NA:Meerow:3601	Guatemala	SAMN15066168
PG81	Hymenocallis glauca	M. Roem.	FTG:Meerow:2433	Mexico	SAMN15066155
M254	Hymenocallis godfreyi	G.Lom.Sm. & Darst	FSU:Godfrey:83721	SE U.S.	SAMN15066156
PG87	Hymenocallis graminifolia	Greenm.	none	Mexico	SAMN15066157
M683	Hymenocallis guianensis	Herb.	FTG:Meerow:2440	Trinidad-Tobago	SAMN15066158
PG91	Hymenocallis henryi	Traub	MO:Traub:282	SE U.S.	SAMN15066159
PG97	Hymenocallis howardii	Bauml	BH:Rawlins & Bauml:157	Mexico	SAMN15066160
PG88	Hymenocallis imperialis	T. M. Howard	MO:Howard & Ogden:86-18	Mexico	SAMN15066161
PG37	Hymenocallis latifolia	(Mill.) M.Roem.	NA:Meerow:3510	Jamaica	SAMN15066162
PG92	Hymenocallis leavenworthii	(Standl. & Steyerm.) Bauml	F:Leavenworth:651	SE U.S.	SAMN15066163
M634	Hymenocallis lehmilleri	T. M. Howard	NA:Meerow:3600	Mexico	SAMN15066164
PG98	Hymenocallis occidentalis	(Leconte) Kunth	none	SE U.S.	SAMN15066165
PG79	Hymenocallis ovata	M. Roem.	NA:Meerow:2431	Cuba	SAMN15066166
PG82	Hymenocallis palmeri	S.Watson	Smith & Garland:162	SE U.S.	SAMN15066167
M249	Hymenocallis proterantha	Bauml	US:Hinton:15972	Mexico	SAMN15066169
M279	Hymenocallis pygmaea	Traub	NA:Meerow:3603	SE U.S.	SAMN15066170
PG83	Hymenocallis riparia	Greenm.	NA:Meerow:3501	Mexico	SAMN15066171
PG90	Hymenocallis rotata	(Ker Gawl.) Herb.	NA:Meerow:3602	SE U.S.	SAMN15066172
M633	Hymenocallis sinaloaensis	Traub	NA:Meerow:3504	Mexico	SAMN15066173
PG39	Hymenocallis sp.1		NA:Meerow 3607	Mexico	SAMN15066174
M252	Hymenocallis sp.2		NA:Meerow:3503	Mexico	SAMN15066175
M669	Hymenocallis speciosa	Salisb.	FTG:Merow:2439	Barbados	SAMN15066176
M251	Hymenocallis tenuiflora	Herb.	NA:Meerow:3511	Panam	SAMN15066177
PG38	Hymenocallis 'Tropical Giant'		FTG:Meerow:1121	Ex hort	SAMN15066178
PG06	Hymenocallis tubiflora	Salisb.	NA:Meerow:3500	Surinam	SAMN15066179
PG11	Ismene amancaes	Herb.	FTG:Meerow:2452	Central Peru	SAMN15066180
M102	Ismene vargasii	(Velarde) Gereau & Meerow	FTG:Meerow:2308	South Peru	SAMN15066181
M769	Leptochiton quitoensis	(Herb.) Sealy	F:Plowman:5411	Ecuador	SAMN15066182
M794	Pamianthe ecollis	Silverst., Meerow & Sánchez-Taborda	CUVC:Sánchez-Taborda:2870	Colombia	SAMN15066183
M640	Pamianthe peruviana	Stapf	FTG:Meerow:2304	Peru	SAMN15066184
M770	Pancratium zeylanicum	L.	NA:Meerow:3604	India	SAMN15066185
M740	Paramongaia milagroantha	(Leiva & Meerow) Meerow	HAO:Leiva & Leiva:5795	North Peru	SAMN15066117
M611	Paramongaia multiflora	Meerow	HUT:Oakeley:s.n.	Central Peru	SAMN15066187
M744	Paramongaia viridiflora	(Ruiz & Pav.) Meerow	NYBG:Weigand et al:5701	Central Peru	SAMN15066188
M743	Paramongaia weberbaueri	Velarde	FTG:Meerow:2303	Central Peru	SAMN15066189
M715	Phaedranassa carmioli	Baker	MO:Hammel:26660	Costa Rica	SAMN15066190
PG04	Phaedranassa cinerea	Ravenna	FTG:Meerow & Meerow:1045	Ecuador	SAMN15066191
PG64	Phaedranassa lehmannii	Regel	CUVC:Londono-Lemos:2	Colombia	SAMN15066192
M457	Phaedranassa ventricosa	Baker	FTG:Meerow:1129	Columbia	SAMN15066193
M713	Plagiolirion horsmannii	Baker	NA:Silverstone-Sopkin:6520	Colombia	SAMN15066194
M677	Pyrolirion albicans	Herb.	NA:Meerow:3601	Central Peru	SAMN15066195
PG12	Pyrolirion tubiflorum	(L'Hér.) M.Roem.	NA:Meerow:3109	Ecuador	SAMN15066196
M730	Rauhia decora	Ravenna	FTG:Meerow:1160	North Peru	SAMN15066197
M656	Rauhia multiflora	(Kunth) Ravenna	FTG:Meerow:2441	North Peru	SAMN15066198
M071	Stenomesson aurantiacum	Herb.	FLAS:Meerow:1061	Ecuador	SAMN15066199
M712	Stenomesson chloranthum	Meerow & van der Werff	FTG:Meerow:2520	North Pru	SAMN15066200
M771	Stenomesson ecuadorense	Meerow, Oleas & Jost	NA:Jost:7949	Ecuador	SAMN15066201
PG62	Stenomesson flavum	(Ruiz & Pav.) Herb.	FTG:Meerow:2430	Central Peru	SAMN15066202
PG02	Stenomesson leucanthum	(Rav.) Meerow & van der Werff	FTG:Meerow:2522	North Peru	SAMN15066203
M076	Stenomesson miniatum	(Herb.) Ravenna	FTG:Meerow:1118	South Peru	SAMN15066204
M768	Stenomesson pearcei	Baker	UC:Hutchison:1808	South Peru	SAMN15066205
PG31	Urceolina microcrater	Kraenzlin	NA:Meerow:3200	North Peru	SAMN15066206
PG28	Worsleya procera	(Lem.) Traub	FTG:Meerow:2411	Brazil	SAMN15066207
