# Supplementary material for: Phylogenomics of the Andean Tetraploid Clade of the American Amaryllidaceae (Subfamily Amaryllidoideae): Unlocking a Polyploid Generic Radiation Abetted by Continental Geodynamics
Source: Front Plant Sci. 2020 Nov 5;11:582422. doi: 10.3389/fpls.2020.582422 (PMC7674842; doi:10.3389/fpls.2020.582422)
Supplement: Supplementary Table 5 — Pseudogenization of ndh genes in plastomes of Eucharideae. [file Table_5.XLSX]

## Sheet: Sheet1
Supplementary Table S5. Pseudogenization of ndh genes in Eucharideae
	Lab number	Species name	ndhB	ndhC	ndhJ	ndhK
	M718	Caliphruria tenera	OK	5 bp insertion, frameshift	13 bp deletion, frameshift	OK
	M711	Caliphruria subedentata	OK	5 bp insertion, frameshift	13 bp deletion, frameshift	OK
	M149	Eucharis amazonica	OK	5 bp insertion, frameshift	13 bp deletion, frameshift	OK
	PG57	Eucharis formosa	OK	5 bp insertion, frameshift	OK	OK
	M793	Eucharis sp.	OK	5 bp insertion, frameshift	OK	OK
	PG55	Eucharis bonplandii	2 bp insertion, frameshift (insertion at 98457-98458)	5 bp insertion, frameshift	OK	OK
	M728	Eucharis caucana	2 bp insertion, frameshift	5 bp insertion, frameshift	OK	OK
	PG34	Caliphruria korsakoffii	7 bp insertion, frameshift	5 bp insertion, frameshift	OK	OK
	PG31	Urceolina microcrater	OK	5 bp insertion, frameshift	OK	OK
	M076	Stenomesson miniatum	6 bp insertion, OK	5 bp insertion, frameshift	OK	OK
	M768	Stenomesson pearcei	6 bp insertion, OK	5 bp insertion, frameshift	OK	OK
	M771	Stenomesson ecuadorense	6 bp insertion, OK	6 bp insertion, OK; 1 SNP, nonsense mutation; 5 bp insertion, frameshift	OK	OK
	M071	Stenomesson aurantiacum	6 bp insertion, OK	5 bp insertion, frameshift	OK	OK
	PG62	Stenomesson flavum	OK	1 SNP, nonsense mutation; 5 bp insertion, frameshift	OK	OK
	PG02	Stenomesson leucanthum	9 bp insertion, OK	1 SNP, nonsense mutation; 5 bp insertion, frameshift	OK	OK
	M712	Stenomesson chloranthum	9 bp insertion, OK	5 bp deletion, frameshift; 5 bp insertion, OK	OK	OK
	PG08	Eucharis sanderi	OK	5 bp insertion, frameshift	OK	OK
	PG32	Eucrosia dodsonii	7 bp insertion, frameshift (insertion at 97245-97251)	OK	OK	OK
	PG63	Eucharis astrophiala	~650 bp deletion	OK	1 base deletion, frameshift	OK
	M713	Plagiolirion horsmannii	6 bp deletion, OK; 7 bp insertion, frameshift	OK	5 bp insertion, frameshift; 2 bp insertion, frameshift	OK
	M018	Eucrosia bicolor	exon2 inversion	OK	OK	OK
	M674	Eucrosia aurantiaca	exon2 inversion	entirely deleted	OK	2/3 deleted
	M631	Eucrosia stricklandii	exon2 inversion	5 bp insertion, frameshift (insertion at 51968)	OK	7 bp insertion, frameshift, (insertion at 51386)
	PG59	Eucrosia mirabilis	exon2 inversion	5 bp insertion, frameshift (insertion at 51415)	OK	OK
	M715	Phaedranassa carmioli	exon2 inversion	1 bp deletion, frameshift (deletion at 52123)	OK	7 bp insertion, frameshift (insertion at 51361)
	PG04	Phaedranassa cinerea	exon2 inversion	1 bp deletion, frameshift	OK	7 bp insertion, frameshift
	PG64	Phaedranassa lehmannii	exon2 inversion	1 bp deletion, frameshift	OK	OK
	M457	Phaedranassa ventricosa	exon2 inversion	1 bp deletion, frameshift	OK	OK
	M730	Rauhia decora	OK	1048 bp deletion, frameshift	1 base insertion, frameshift	10 bp deletion, frameshift; 4 bp deletion, frameshift
	M656	Rauhia multiflora	OK	1048 bp deletion, frameshift	1 base insertion, frameshift	10 bp deletion, frameshift; 4 bp deletion, frameshift
